# Supplementary material for: Proteomic analysis of HDL from inbred mouse strains implicates APOE associated with HDL in reduced cholesterol efflux capacity via the ABCA1 pathway
Source: PubMed Central journal article supplement (PMC4727420; doi:10.1194/jlr.m063701), 2016-02

## Supplemental Table and Figure Legends

### **Supplemental Table 1. Proteins detected by LC-ESI MS/MS in the 5 strains of inbred mice.**

All protein identifications required: (i) detection of at least 2 unique peptides for each protein from at least three different mice and (ii) identification in  $\geq 75\%$  of mice in at least one strain of animals. Spectral counts for each protein are normalized to total peptide spectral counts in each analysis and represent relative abundance. Data are mean $\pm$ SD. Significance was assessed by non-parametric ANOVA and the Kruskal Wallis test.

**Supplemental Figure 1. Cluster analysis of the relative levels of proteins in HDLs in the five strains of inbred mice.** The relationships were determined by Euclidean distance clustering.

**Supplemental Figure 2. HDL lipid profiles of the 5 strains of inbred mouse strains. (A-E)** Lipids and APOA1 were measured in serum depleted of APOB containing lipoproteins. **(F)** Percent of lipid moieties and protein in ultracentrifugation isolated HDL.

**Supplemental Figure 3. Correlations of serum HDL-C, APOA1 and phospholipids with macrophage and ABCA1-specific cholesterol efflux capacities.** Serum HDL was obtained by polyethylene glycol (PEG) precipitation of APOB containing lipoproteins from plasma-derived serum. Efflux of [ $^3$ H]cholesterol was measured after a 4 h incubation in medium with serum HDL (2.8% v/v) as described in Methods. The relationship of each HDL metric to efflux capacity was quantified by Pearson's correlation.

# Supplemental Figure 1

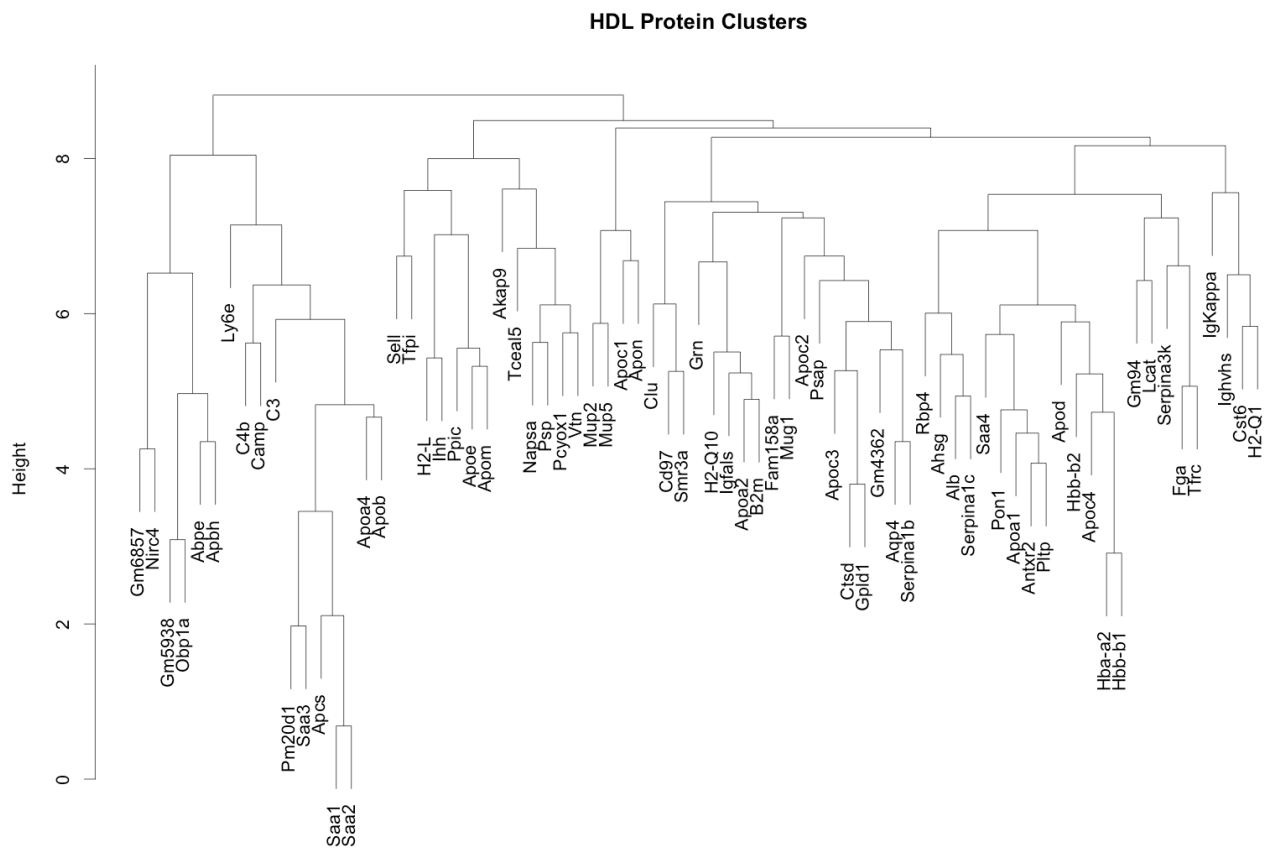

# Supplemental Figure 2

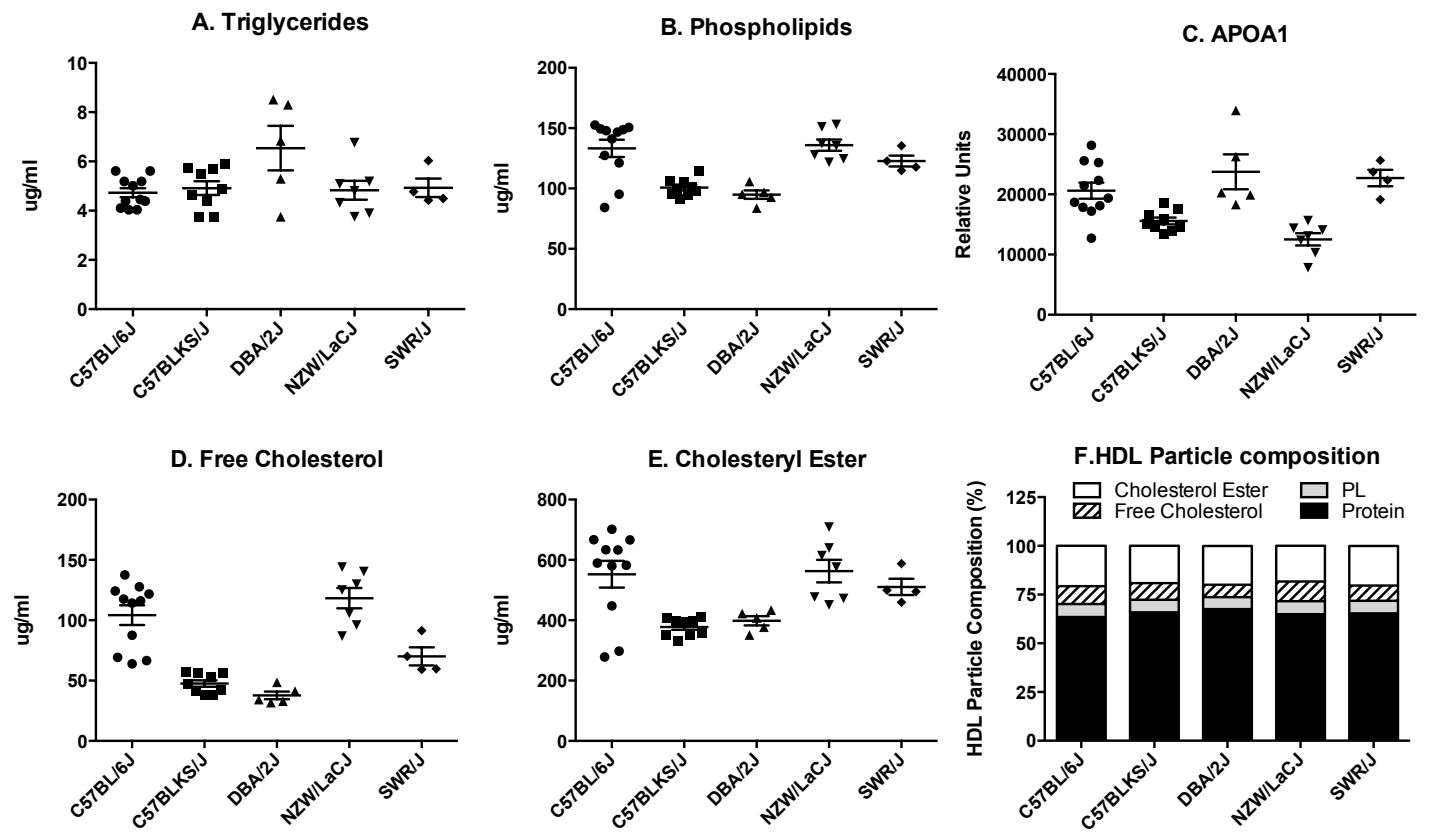

Supplemental Figure 3

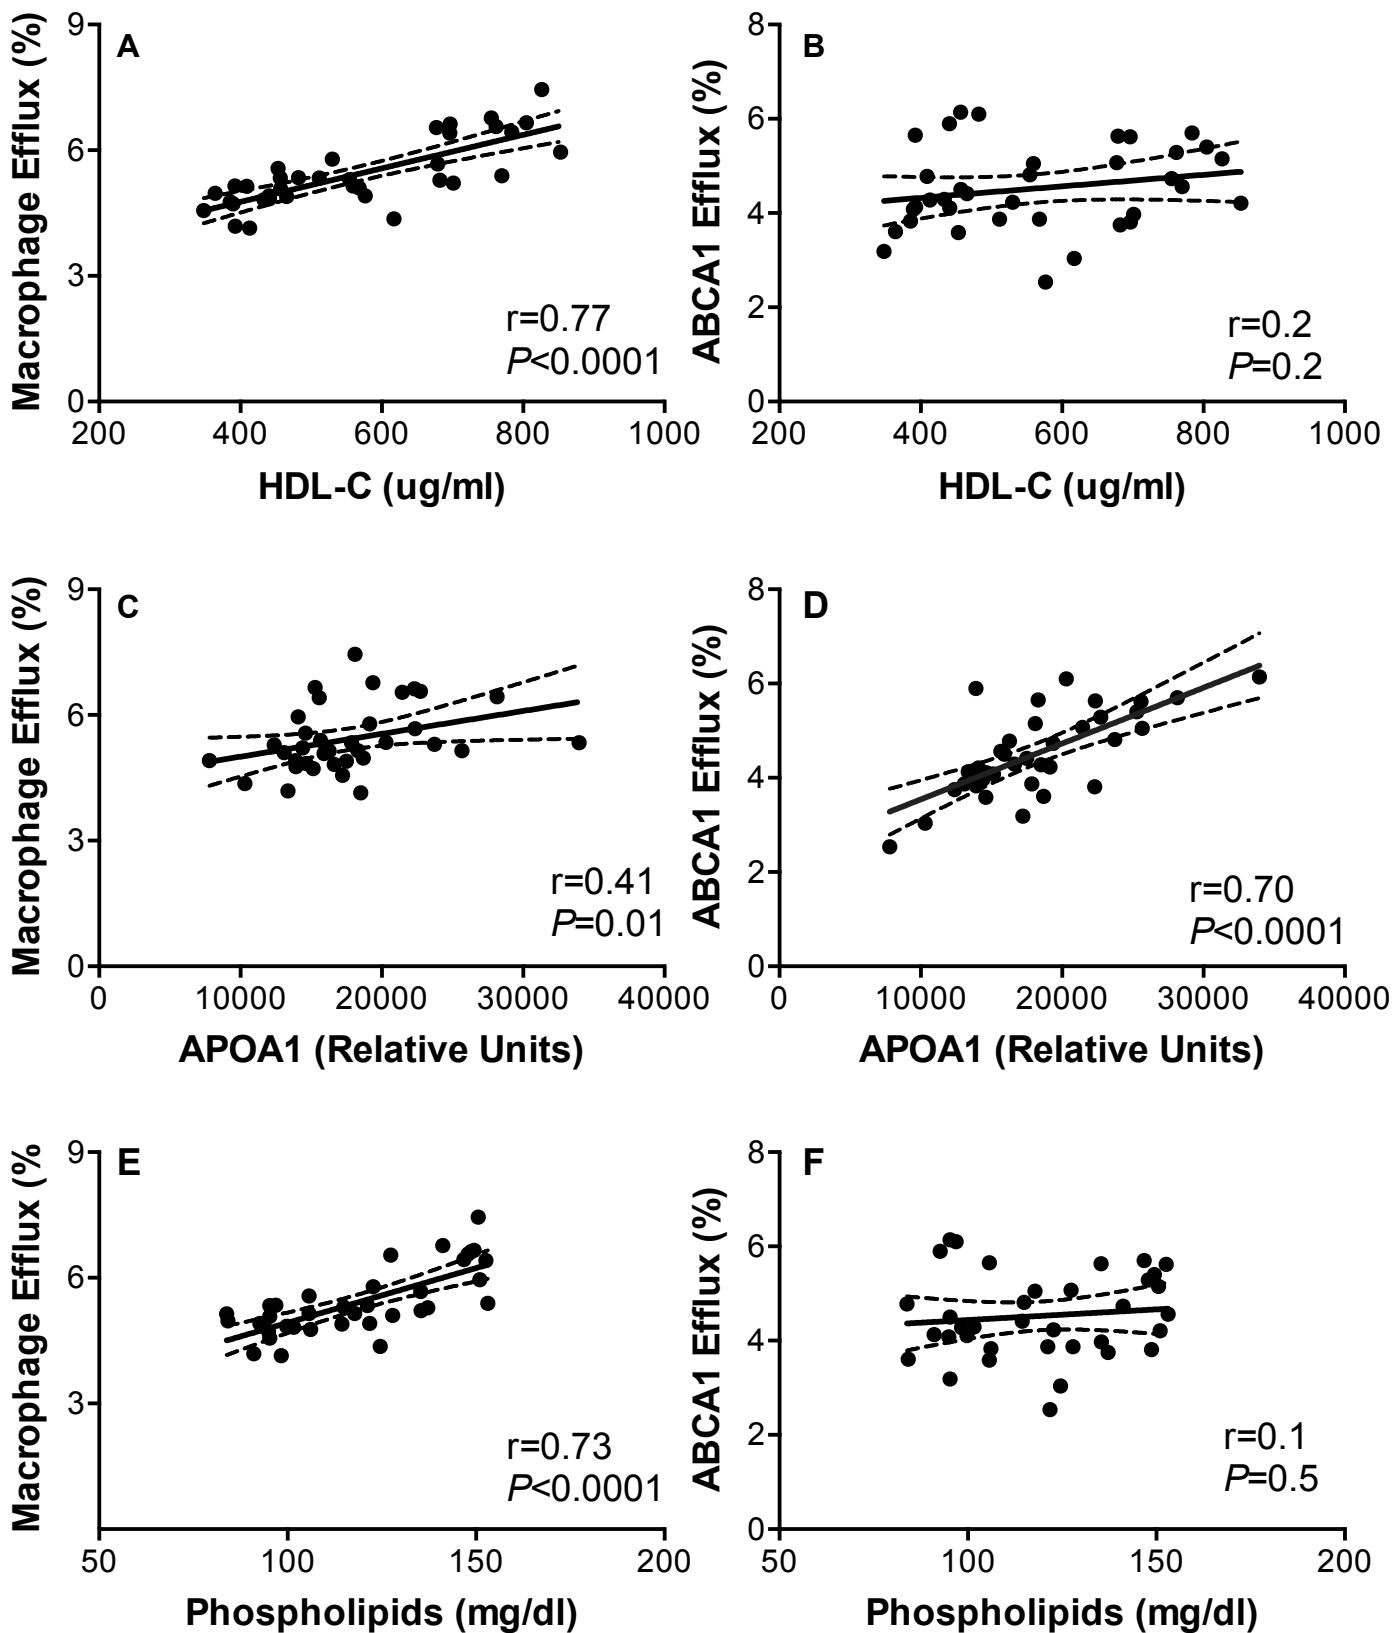

Supplement: 10.1194_M063701_jlr.M063701-2.pdf [file 10.1194_M063701_jlr.M063701-2.pdf]
